## EDITORIAL

# Tilt-table testing: transient loss of consciousness discriminator or epiphenomenon?

Sanjiv Petkar and Adam Fitzpatrick\*

Manchester Heart Centre, Manchester Royal Infirmary, Manchester, UK

Received 2 December 2007; accepted after revision 31 March 2008; online publish-ahead-of-print 26 April 2008

## Introduction

Syncope accounts for 1–1.5% of emergency room visits and up to 6% of general hospital admissions.<sup>1–4</sup> Patients with syncope present with a blackout,<sup>5</sup> or transient loss of consciousness (T-LOC), and may present in family practice, cardiology, general medicine, accident and emergency, neurology, geriatric medicine, and psychiatry. Generally, a patient with T-LOC can only give limited details of the event, covering premonition and aftereffects. An eye-witness account is essential for filling in details during T-LOC. However, there are important causes of T-LOC other than syncope, e.g. generalized epilepsy and psychogenic blackouts. When patients present having had T-LOC, clinicians seek a test that will discriminate between these important causes. Is tilt-table testing such a test?

Tilt testing is a simple, non-invasive test with a low risk of complications.<sup>6</sup> The physiological and pathophysiological effects of orthostatic stress by tilt testing have been known for 60 years.<sup>7</sup> In 1986, Kenny *et al.*<sup>8</sup> observed a high rate of tilt-induced syncope, with hypotension and bradycardia, in patients with syncope of previously unknown origin when compared with controls. Subsequently, many reports profiled the use of the test, and guidelines and recommendations emerged.<sup>6</sup> However, clinical practice featured a very variable yield from a wide range of protocols, varying in duration and angle of tilt, the use of drug provocation to increase yield, and most importantly, the type of patients studied. Such factors presumably underlie the variable yield of tilt-table testing, which is from 26 to 87%.<sup>9</sup> The overall reproducibility of a negative response (85–94%)<sup>10–14</sup> is higher than that of an initial positive response (31–92%). The impact of these variations in protocol and patient clinical types, and their effect on the interpretation of a test result for T-LOC discrimination, is considered below.

## What types of patients were studied?

Most studies using tilt testing have done so in patients who have already been labelled with 'syncope', not 'T-LOC'. Few have studied unselected T-LOC patients in order to evaluate tilt testing as a discriminator of the underlying cause of T-LOC. The evidence that tilt testing can discriminate between causes of T-LOC is limited. In one study<sup>15</sup> of 145 unselected patients with T-LOC of uncertain cause presenting to the emergency department, the overall yield of tilt testing was only ~20%, was little enhanced by drug provocation, and was clearly dependent on the clinical features of patients. High rates of positive tests (~70%) were seen in elderly patients with recurrent T-LOC and no structural heart disease. No positive tests were found in young patients with T-LOC and repaired congenital heart disease. These findings indicated that the pre-test clinical characteristics of patients tended to determine the outcome of the test, and also that the sensitivity was imperfect—e.g. the cause of T-LOC in the 30% of elderly patients with a negative tilt remained unclear. In another study, a 'positive' test could be achieved in an important group, but without reproduction of syncope. In patients with suspected psychogenic blackouts, apparent T-LOC could be induced on tilt-table testing, but without any change in the heart rate, blood pressure, or electroencephalographic (EEG) recordings.<sup>16</sup> The positive response appeared to be more likely if suggested to the patient prior to tilting and could even predict the time of the apparent T-LOC.

## Even positive responses are poorly reproducible

When patients with a positive tilt test are restudied by tilting, 50% of them will become negative, irrespective of whether they have received treatment or not.<sup>17–19</sup> This poor reproducibility is unexplained, but goes hand-in-hand with the less than perfect sensitivity in groups with a high pre-test likelihood of a positive tilt, i.e. patients with

The opinions expressed in this article are not necessarily those of the Editors of *Europace* or of the European Society of Cardiology.

\* Corresponding author. Tel: +44 161 276 8903.

E-mail address: adam.fitzpatrick@cmmc.nhs.uk

recurrent syncope and no structural heart disease. It seems that a tilt test may be positive one day and negative the next and may be subject to unknown day-to-day variables, even in susceptible patients.

### Drug provocation increases sensitivity, but reduces specificity

Drug provocation has been used in an attempt to improve the sensitivity of the test but necessarily reduces the specificity at the same time.<sup>20</sup> When a standard tilt test is negative, the European Society of Cardiology<sup>6</sup> recommends drug provocation with intravenous isoprenaline or sublingual nitroglycerin.<sup>6</sup>

Using isoprenaline shortens the time required for a tilt test, but an increase in yield is at the expense of a decrease in specificity.<sup>21</sup> The response to isoprenaline may be non-specific. Kapoor and Brant<sup>22</sup> subjected 20 patients with syncope of unknown aetiology and 40 controls to tilt testing and isoprenaline infusion. Positive response to tilt testing in patients was 75% (95% CI 55–95%) and among controls 55% (CI 20–86%). Tilt-induced symptoms were similar in patients and controls. Such high rates of false-positive results indicate that drug-provoked tilt testing is unlikely to discriminate between causes of T-LOC. Other drugs have similar shortcomings. The use of nitroglycerin also increases the sensitivity of the test but, like isoprenaline, at the cost of decreased specificity.<sup>23–25</sup>

### Low specificity and poor reproduction of spontaneous features

Englund *et al.*<sup>26</sup> tilted patients with bifascicular block with and without symptoms of T-LOC. Symptomatic patients with bifascicular block had similar rates of positive tilt to asymptomatic patients (28 vs. 32%,  $P = \text{ns}$ ), further questioning the specificity of the test. In addition, the false-negative rates are also likely to be high, as high as 14–30%.<sup>27</sup> Importantly, the mechanism of tilt-induced syncope is frequently different from that of spontaneous syncope recorded with an implantable loop recorder.<sup>27,28</sup> More patients were found to have a bradycardic or asystolic response on an implantable loop recorder than that found during tilt-table testing. The positive predictive value was 80% for an asystolic response during tilt testing, predicting a similar response during spontaneous episodes documented by an implantable loop recorder.<sup>28</sup>

### Value of tilt testing in guiding treatment

Results of the tilt-table test cannot be used to predict response to treatment. Sud *et al.*<sup>29</sup> performed a meta-analysis to determine whether permanent pacemaker therapy prevents refractory vasovagal syncope. Nine randomized trials (two double blind, seven open label or single blind) were analysed. Although permanent pacing reduced the risk of recurrent syncope in unblinded studies, and in studies comparing pacemaker algorithms, no effect was seen in double-blind trials. Patients in these trials were recruited on the basis of the results of the tilt-table test. However, the above results did not change even when the analysis was restricted to patients with marked

cardio-inhibitory response on the tilt-table test. The meta-analysis concluded that the treatment effect of pacemakers in patients with reflex syncope has been overestimated and that the apparent response was due to a strong expectation response to pacing. In contrast, preliminary studies using asystolic episodes causing spontaneous syncope recorded on implantable electrocardiogram (ECG) loop recorders do appear to predict a good response to pacing.<sup>30</sup> Further studies are required, and planned, to confirm this, but it may be that an asystolic response to tilt is an unreliable guide to the application of pacing, and that the recording of spontaneous asystole is required to ensure a confident recommendation of pacing.

### Is tilt testing better than clinical assessment?

The importance of a good history in the evaluation of patients presenting with T-LOC was assessed in the Syncope Symptom Study, in which a uniform 118-item historical questionnaire was administered to 671 patients who were referred to three academic centres in Canada and Wales. On the basis of the questionnaire, a point score was developed. The cause of loss of consciousness was known satisfactorily in 539 patients and included seizures ( $n = 102$ ; complex partial epilepsy and generalized epilepsy) and syncope [ $n = 437$ ; tilt positive vasovagal syncope (267 patients), ventricular tachycardia (90 patients), and other diagnoses such as complete heart block and supraventricular tachycardia (80 patients)]. The point score based on symptoms alone correctly classified 94% of the patients, diagnosing seizures with 94% sensitivity and 94% specificity.<sup>31</sup> A further study from the same group administered this questionnaire to 418 patients with syncope and no apparent structural heart disease.<sup>32</sup> The point score correctly classified 90% of the patients, diagnosing vasovagal syncope with 89% sensitivity and 91% specificity. The decision rule used in the study suggested that 68% of an additional 95 patients with T-LOC and a negative tilt-table test had vasovagal syncope. Moreover, this study suggested that there is a close symptomatic similarity between most patients with negative and positive tilt tests, which would be consistent with the idea that most patients with negative tilt tests have false-negative tests. The results of the recently published Fainting Assessment Study<sup>33</sup> showed that attending physicians could make a diagnosis based on the initial evaluation in 63% of the patients with T-LOC, with an overall diagnostic accuracy of 88%. Furthermore, the conclusion was that the use of additional testing beyond history, physical examination, and ECG could be avoided in many patients presenting with T-LOC. A lower sensitivity for arriving at a diagnosis of T-LOC was found for a combination of these three modalities (a good history, physical examination, and an ECG) by Linzer *et al.*<sup>34</sup> in an earlier meta-analysis of six population-based studies. These studies suggest that clinical features are a good diagnostic predictor in T-LOC and that a good history is probably better than a tilt-table test. These studies also suggest that an ideal test for the cause of T-LOC would be one that measures physiological parameters such as ECG, blood pressure and EEG, or their surrogates, during a spontaneous attack. This would be superior to provoked testing, such as the tilt-table test, with its high rates of false-positive and false-negative results. However, given the infrequent symptoms of most patients with

T-LOC, opportunities to capture all these physiological parameters are necessarily limited at present.

## So should we abandon tilt testing?

The European Society of Cardiology<sup>6</sup> currently recommends tilt testing (Class I) in the following situations.

1. In the case of unexplained single syncopal episode in high-risk settings (e.g. occurrence of, or potential risk for, physical injury or with occupational implications), or recurrent episodes in the absence of organic heart disease, or, in the presence of organic heart disease, after cardiac causes of syncope have been excluded.
2. When it will be of clinical value to demonstrate susceptibility to neurally mediated syncope to the patient.

In a patient with Reflex Syncope, the reproduction of and the measurement of physiological variables during symptoms while undergoing a tilt test are likely to be reassuring to the patient for a number of reasons: (i) the patient is reassured that a medical professional has had a chance to observe their symptoms; (ii) the abnormal physiological parameters observed during a positive test provide a ready and logical explanation to the patient about the mechanism of their symptoms; and (iii) in those with a true positive tilt test, patients are relieved to know that their symptoms are nothing more serious than a common faint.

As already mentioned earlier, tilt testing is useful in patients with psychogenic blackouts, presenting with apparent T-LOC. Tilt testing may also be useful in the diagnosis of orthostatic intolerance.<sup>35</sup>

Carotid sinus hypersensitivity is an important cause of syncope in elderly patients.<sup>6,36</sup> Cardio-inhibitory and mixed types of carotid sinus hypersensitivity are amenable to permanent pacing with a decrease in syncopal events by 80%.<sup>37,38</sup> Parry *et al.*<sup>39</sup> demonstrated that undertaking the carotid sinus massage in the supine position only, as opposed to an upright position (on a tilt-table test), underestimated the frequency of a positive response and prevents pacing being offered to a significant group of patients.

Tilt testing may be useful not as a discriminator of T-LOC but as a form of therapy. Tilt training (tilting to a 60° angle daily until syncope or until a maximum of 45–90 min) has been advocated as a treatment for recurrent reflex syncope.<sup>40,41</sup> The medium- and long-term results of this treatment appear to be mixed. Gurevitz *et al.*<sup>42</sup> found no benefit of tilt training in 46 patients over a 1-year period, whereas Reybrouck *et al.*<sup>43</sup> found that 81% of the 38 patients remained free of syncope over a period of 43 ± 7.8 months.

Another therapeutic area where tilt testing is likely to be useful is in the demonstration of the use of counter-pressure manoeuvres to abort an impending episode. Brignole *et al.*<sup>44</sup> showed that performance of the isometric arm counter-pressure manoeuvre during tilt testing at the onset of the prodromal phase of Reflex Syncope resulted in a significant increase in systolic blood pressure with the abolition of symptoms in 63% of the patients (vs. 11% in the control arm,  $P=0.01$ ). Similar beneficial effects of counter-pressure manoeuvres during tilt testing have also been demonstrated by Krediet *et al.*<sup>45</sup>

## Conclusions

The evidence base suggests that the usefulness of tilt-table testing in the management of patients with syncope is limited by poor specificity, sensitivity, reproducibility, and misleading characteristics for guiding treatment. As the evidence base has been acquired almost entirely in patients with suspected syncope, rather than T-LOC, tilt-table testing is unlikely to be of value in the discrimination of the cause of T-LOC. A skilled and thorough clinical evaluation is always required, backed up by an ECG in all cases, to exclude high-risk structural or electrical heart disease, and if done diligently, may be less misleading than tilt testing. Implantable ECG recorders seem to hold promise for determining when T-LOC is caused by, or associated with, asystole, and when it is, guiding the appropriate use of pacemakers. However, some patients with epilepsy have associated asystole during seizures<sup>46</sup>, therefore a finding of asystole is not a guarantee that the diagnosis is reflex asystolic syncope. Improved implantable diagnostics that sample multiple physiological parameters during a spontaneous T-LOC are required and may be the way forward for discrimination between the causes of T-LOC.

**Conflict of interest:** S.P. is supported by a research grant from Medtronic Inc., USA to the University of Manchester.

## Funding

S.P. is supported by a research grant from Medtronic Inc. USA to the University of Manchester for the REVISE Study (Reveal in the Investigation of Syncope and Epilepsy).

## References

1. Blanc JJ, L'Her C, Touiza A, Garo B, L'Her E, Mansourati J. Prospective evaluation and outcome of patients admitted for syncope over a 1 year period. *Eur Heart J* 2002;23:815–20.
2. Quinn JV, Stiell IG, McDermott DA, Sellers KL, Kohn MA, Wells GA. Derivation of the San Francisco syncope rule to predict patients with short term serious outcomes. *Ann Emerg Med* 2004;43:224–32.
3. Silverstein MD, Singer DE, Mulley AG, Thibault GE, Barnett GO. Patients with syncope admitted to medical intensive care units. *JAMA* 1982; 248:1185–9.
4. Ammirati F, Colivicchi F, Minardi G, De Lio L, Terranova A, Scaffidi G *et al.* Hospital management of syncope: the OESIL study (Osservatorio Epidemiologico della Sincope nel Lazio). *G Ital Cardiol* 1999;29:533–9.
5. Definition of blackout: 'temporary complete loss of consciousness'. Oxford English Dictionary. <http://dictionary.oed.com/://dictionary.oed.com/> (2 November 2007, date last accessed).
6. Guidelines on Management (Diagnosis and Treatment) of Syncope—Update 2004. The task force on syncope, European Society of Cardiology. *Europace* 2004;6:467–537.
7. Allen SC, Taylor CL, Hall VE. A study of orthostatic insufficiency by the tiltboard method. *Am J Physiol* 1945;143:11.
8. Kenny RA, Ingram A, Bayliss J, Sutton R. Head-up tilt: a useful test for investigating unexplained syncope. *Lancet* 1986;1:1352–5.
9. Fitzpatrick AP, Zaidi A. Tilt methodology in reflex syncope: emerging evidence. *J Am Coll Cardiol* 2000;36:179–80.
10. Sheldon R, Splawinski J, Killam S. Reproducibility of isoproterenol tilt-table tests in patients with syncope. *Am J Cardiol* 1992;69:1300–5.
11. Grubb BP, Wolfe D, Temeszy Armos P, Hahn H, Elliott L. Reproducibility of head upright tilt-table test in patients with syncope. *Pacing Clin Electrophysiol* 1992;15:1477–81.
12. De Buitler M, Grogan EW Jr, Picone MF, Casteen JA. Immediate reproducibility of tilt table test in adults with unexplained syncope. *Am J Cardiol* 1993;71:304–7.
13. Brooks R, Ruskin JN, Powell AC, Newell J, Garan H, McGovern BA. Prospective evaluation of day-to-day reproducibility of upright tilt-table testing in unexplained syncope. *Am J Cardiol* 1993;71:1289–92.

14. Blanc JJ, Mansourati J, Maheu B, Boughaleb D, Genet L. Reproducibility of a positive passive upright tilt table test at a seven-day interval in patients with syncope. *Am J Cardiol* 1993;72:469-71.
15. Fitzpatrick AP, Lee RJ, Epstein LM, Lesh MD, Eisenberg S, Sheinman MM. Effect of patient characteristics on the yield of prolonged baseline head-up tilt testing and the additional yield of drug provocation. *Heart* 1996;76:406-11.
16. Petersen MEV, Williams TR, Sutton R. Psychogenic syncope diagnosed by prolonged head-up tilt testing. *Q J Med* 1995;88:209-13.
17. Moya A, Permanyer-Miralda G, Sagrista-Sauleda J, Carne X, Rius T, Mont L *et al.* Limitations of head-up tilt table test for evaluating the efficacy of therapeutic interventions in patients with vasovagal syncope: results of a controlled study of etilefrine versus placebo. *J Am Coll Cardiol* 1995;25:65-9.
18. Morillo CA, Leitch JW, Yee R, Klein GJ. A placebo controlled trial of intravenous and oral disopyramide for prevention of neurally mediated syncope induced by head-up tilt. *J Am Coll Cardiol* 1993;22:1843-8.
19. Raviele A, Brignole M, Sutton R, Alboni P, Giani P, Menozzi C *et al.* Effect of etilefrine in preventing syncopal recurrence in patients with vasovagal syncope: a double-blind, randomised, placebo-controlled trial. The Vaso-vagal Syncope International Study. *Circulation* 1999;99:1452-7.
20. Sheldon R. Initial evaluation of the syncope patient. Part 2: role of defined questionnaire for diagnosis of syncope and other forms of transient loss of consciousness. In Benditt DG, Blanc JJ, Brignole M, Sutton R (eds). *The Evaluation and Treatment of Syncope. A Handbook for Clinical Practice*. New York: Futura for Blackwell Publishing 2003 pp. 46-50.
21. Shen WK, Jahangir A, Beinborn D, Lohse CM, Hodge DO, Rea RF *et al.* Utility of a single-stage isoproterenol tilt table test in adults: a randomised comparison with passive head-up tilt. *J Am Coll Cardiol* 1999;33:985-90.
22. Kapoor WN, Brant N. Evaluation of syncope by upright tilt testing with isoproterenol. A nonspecific test. *Ann Intern Med* 1992;116:358-63.
23. Aerts A, Dendale P, Strobel G, Block P. Sublingual nitrates during head-up tilt testing for the diagnosis of vasovagal syncope. *Am Heart J* 1997;133:504-7.
24. Aerts AJ, Dendale P, Daniels C, Meyvisch P, Kaufman L, Strobel G *et al.* Intravenous nitrates for pharmacological stimulation during head-up tilt testing in patients with suspected vasovagal syncope and healthy controls. *Pacing Clin Electrophysiol* 1999;22:1593-8.
25. Raviele A, Giada F, Brignole M, Menozzi C, Marangoni E, Manzillo GF *et al.* Comparison of diagnostic accuracy of sublingual nitroglycerin test and low-dose isoproterenol test in patients with unexplained syncope. *Am J Cardiol* 2000;85:1194-8.
26. Englund A, Fredrikson M, Rosenqvist M. Head-up tilt test. A nonspecific method of evaluating patients with bifascicular block. *Circulation* 1997;95:951-4.
27. Moya A, Brignole M, Menozzi C, Garcia-Civera R, Tognarini S, Mont L *et al.* for the International Study on Syncope of Uncertain Etiology (ISSUE) Investigators. Mechanism of syncope in patients with isolated syncope and in patients with tilt positive syncope. *Circulation* 2001;104:1261-7.
28. Brignole M, Sutton R, Menozzi C, Garcia-Civera R, Moya A, Wieling W *et al.* for the International Study on Syncope of Uncertain Etiology 2 (ISSUE 2) Group. Lack of correlation between the responses to tilt testing and adenosine triphosphate test and the mechanism of spontaneous neurally mediated syncope. *Eur Heart J* 2006;27:2232-9.
29. Sud S, Massel D, Klein GJ, Leong-Sit P, Yee R, Skanes AC *et al.* The expectation effect and cardiac pacing for refractory vasovagal syncope. *Am J Med* 2007;120:54-62.
30. Brignole M, Sutton R, Menozzi C, Garcia-Civera R, Moya A, Wieling W *et al.* for the International Study on Syncope of Uncertain Etiology 2 (ISSUE 2) Group. Early application of an implantable loop recorder allows effective specific therapy in patients with recurrent suspected neurally mediated syncope. *Eur Heart J* 2006;26:1085-92.
31. Sheldon R, Rose S, Ritchie D, Connolly SJ, Koshman ML, Lee MA *et al.* Historical criteria that distinguish syncope from seizures. *J Am Coll Cardiol* 2002;40:142-8.
32. Sheldon R, Rose S, Connolly SJ, Ritchie D, Koshman ML, Frenneaux M. Diagnostic criteria for vasovagal syncope based on a quantitative history. *Eur Heart J* 2006;27:344-50.
33. van Dijk N, Boer KR, Colman N, Bakker A, Stam J, van Gieken JJM *et al.* High diagnostic yield and accuracy of history, physical examination, and ECG in patients with transient loss of consciousness in FAST: the fainting assessment study. *J Cardiovasc Electrophysiol* 2008;19:48-55.
34. Linzer M, Yang EH, Estes NA 3rd, Wang P, Vorperian VR, Kapoor WN. Diagnosing syncope. Part I: value of history, physical examination, and electrocardiography. *Ann Intern Med* 1997;126:989-96.
35. Lahrmann H, Cortelli P, Hilz M, Mathias CJ, Struhal W, Tassinari M. EFNS guidelines on the diagnosis and management of orthostatic hypotension. *Eur J Neurol* 2006;13:930-6.
36. McIntosh SJ, Lawson J, Kenny RA. Clinical characteristics of vasodepressor, cardioinhibitory and mixed carotid sinus syndrome in the elderly. *Am J Med* 1993;95:203-8.
37. Huang SK, Ezri MD, Hauser RG, Denes P. Carotid sinus hypersensitivity in patients with unexplained syncope: clinical electrophysiological and long term follow-up observations. *Am Heart J* 1988;116:989-96.
38. Crilly JG, Herd B, Khurana CS, Appleby CA, de Belder MA, Davies A *et al.* Permanent pacing in elderly patients with recurrent falls, dizziness and syncope, and a hypersensitive cardioinhibitory reflex. *Postgrad Med J* 1997;73:415-8.
39. Parry SW, Richardson DA, O'Shea D, Sen B, Kenny RA. Diagnosis of carotid sinus hypersensitivity in older adults: carotid sinus massage in the upright position is essential. *Heart* 2000;83:22-3.
40. Ector H, Reybrouck T, Heidbuchel H, Gewillig M, van de Werf F. Tilt training: a new treatment for recurrent neurocardiogenic syncope and severe orthostatic intolerance. *Pacing Clin Electrophysiol* 1998;21:193-6.
41. Reybrouck T, Heidbuchel H, van de Werf F, Ector H. Tilt training: a treatment for malignant and recurrent neurocardiogenic syncope. *Pacing Clin Electrophysiol* 2000;23:493-8.
42. Gurevitz O, Barsheshet A, Bar-Lev D, Zimlichman E, Rosenfeld GF, Benderly M *et al.* Tilt training: does it have a role in preventing vasovagal syncope. *PACE* 2007;30:1499-505.
43. Reybrouck T, Heidbuchel H, van de Werf F, Ector H. Long term follow-up results of tilt training in patients with recurrent neurocardiogenic syncope. *Pacing Clin Electrophysiol* 2002;25:1441-6.
44. Brignole M, Croci F, Menozzi C, Solano A, Donato P, Oddone D *et al.* Isometric arm counter-pressure maneuvers to abort impending vasovagal syncope. *J Am Coll Cardiol* 2002;40:2053-9.
45. Krediet PCT, van Dijk N, Linzer M, van Lieshout JJ, Wieling W. Management of vasovagal syncope: controlling or aborting faints by leg crossing and muscle tensing. *Circulation* 2002;106:1684-9.
46. Rugg-Gunn FJ, Simister RJ, Squirell M, Holdright DR, Duncan JS. Cardiac arrhythmias in focal epilepsy: a prospective long-term study. *Lancet* 2004;364:2212-9.
